# Supplementary material
Source: HighWire-hosted journal article supplement (https://aa.uwpress.org/content/suppl/2024/07/25/59.2.107)
Supplement: AAv59n02_SchmidtAppendix2.pdf [file AAv59n02_SchmidtAppendix2.pdf]

**Appendix 2**

**11 fur parkas with double hood roots**

| Photo, front                                                                        | Object ID | Inventory number | Gender     | Provenance                         | Dating  | Collector/donator                                                       | Double hood roots     | Gusset in sleeve | Lower edging                      | Species identification Reg. July 21, 2023                                                                             |
|-------------------------------------------------------------------------------------|-----------|------------------|------------|------------------------------------|---------|-------------------------------------------------------------------------|-----------------------|------------------|-----------------------------------|-----------------------------------------------------------------------------------------------------------------------|
|    | 90710     | NMD: Kc.99       | Male       | Cape Dezhnev (East Cape), Siberia  | 1860    | Olrik                                                                   | At the front          | Yes              | Straight cut                      | Caribou (macroscopical identification)<br>Wolverine (DNA analysis, hair microscopy)<br>Domestic dog (hair microscopy) |
|    | 36682     | NMD: P.6403      | Male (boy) | Northern Alaska                    | 1945    | Helge Larsen                                                            | At the front          | Yes              | Straight cut                      | Caribou (macroscopical identification)<br>Wolverine (DNA analysis, hair microscopy)                                   |
|    | 36676     | NMD: P.6396      | Male       | Northern Alaska                    | 1945    | Helge Larsen                                                            | At the front          | Yes              | Straight cut                      | Caribou (macroscopical identification)<br>Wolf (DNA analysis)                                                         |
|    | 36677     | NMD: P.6397      | Male       | Northern Alaska                    | 1945    | Helge Larsen                                                            | At the front          | Yes              | Straight cut                      | Caribou (macroscopical identification)<br>Domestic dog (DNA analysis)                                                 |
|    | 36676     | NMD: P.6396      | Male       | Northern Alaska                    | 1945    | Helge Larsen                                                            | At the front          | Yes              | Slightly curved lower bottom      | Caribou (macroscopical identification)<br>Wolf (DNA analysis)                                                         |
|    | 36958     | NMD: P32.1       | Female     | Alaska                             | 1926    | Knud Rasmussen                                                          | At the front          | Yes              | Straight cut                      | Caribou (macroscopical identification)<br>Dog family (DNA analysis, hair microscopy)                                  |
|    | 36678     | NMD: P.6398      | Female     | Alaska                             | 1945    | Helge Larsen                                                            | At the front and back | Yes              | Slightly curved lower bottom      | Caribou (macroscopical identification)<br>Wolverine (macroscopical identification)                                    |
|   | 72399     | NMD: P.1334      | Female     | Koyukuk at the Yukon River, Alaska | 1935    | Frederica de Laguna                                                     | At the front          | Yes              | Large flaps at the front and back | Caribou (macroscopical identification)<br>Wolverine (macroscopical identification)                                    |
|  | 61572     | NMD: Hc.414      | Male       | Mackenzie River                    | 1860    | R.W. Hobson, McClintock-expedition in search of the Franklin Expedition | At the front          | Yes              | Slightly curved lower bottom      | Marmot (macroscopical identification)<br>Mammal not identified (macroscopical identification)                         |
|  | 37351     | NMD: P30.9       | Male       | Kiillinnguyaq (Kent Peninsula)     | 1923    | Knud Rasmussen                                                          | At the front          | Yes              | Straight cut                      | Marmot, Richardson's ground squirrel (DNA analysis, hair microscopy)<br>Wolf (DNA analysis, hair microscopy)          |
|  | 94270     | NMD: P.9594      | Male       | No data                            | No data | No data                                                                 | At the front          | Yes              | Straight cut                      | Caribou (macroscopical identification)                                                                                |
